# Supplementary material for: Potassium Intake and Blood Pressure: A Dose‐Response Meta‐Analysis of Randomized Controlled Trials
Source: PubMed Central journal article supplement — J Am Heart Assoc. 2020 Jun 5;9(12):e015719. doi: 10.1161/JAHA.119.015719 (PMC7429027; doi:10.1161/jaha.119.015719), 2020-06-05

# **SUPPLEMENTAL MATERIAL**

**Table S1. PubMed search strategy for potassium supplementation and blood pressure levels in experimental studies.**

| <b>Database</b> | <b>Search strategy</b>                                                                                                                                                                                                                                                                                                                                                                                                                                              |
|-----------------|---------------------------------------------------------------------------------------------------------------------------------------------------------------------------------------------------------------------------------------------------------------------------------------------------------------------------------------------------------------------------------------------------------------------------------------------------------------------|
| PubMed          | ((“blood pressure”[MeSH Term] OR “blood pressure determination”[MeSH Term] OR “arterial pressure”[MeSH Term]) OR “hypertension”[MeSH Term] OR “blood pressure”[tiab] OR “hypertension”[tiab]) AND (“potassium, dietary”[MeSH Term] OR “potassium”[MeSH Term] OR “potassium chloride”[MeSH Term] OR “potassium”[tiab] OR “potassium chloride”[tiab]) AND (“dietary supplements”[MeSH Term] OR “supplement”[tiab]) NOT (“animals”[MeSH Term] NOT “humans”[MeSH Term]) |

**Table S2. Risk of bias of included studies.**

| References                       | Domain 1      | Domain 2      | Domain 3      | Domain 4      | Domain 5      | Domain 6      | Overall RoB   |
|----------------------------------|---------------|---------------|---------------|---------------|---------------|---------------|---------------|
| Barden 1986 <sup>40</sup>        | Some Concerns | Low           | Low           | Low           | Some Concerns | Some Concerns | Some Concerns |
| Berry 2010 <sup>39</sup>         | Some Concerns | Low           | Low           | Low           | Some Concerns | Low           | Some Concerns |
| Braschi 2008 <sup>38</sup>       | Low           |
| Bulpitt 1985 <sup>41</sup>       | Some Concerns | Low           | Low           | Low           | Some Concerns | Low           | Some Concerns |
| Chalmers 1986 <sup>42</sup>      | Some Concerns | Low           | Low           | Low           | Low           | Low           | Some Concerns |
| Forrester 1988 <sup>43</sup>     | High          | Low           | Low           | Low           | Some Concerns | Some Concerns | High          |
| Fotherby 1992 <sup>44</sup>      | Low           | Low           | Low           | Low           | Some Concerns | Some Concerns | Some Concerns |
| Franzoni 2005 <sup>45</sup>      | Some Concerns | Low           | Low           | Low           | Some Concerns | Low           | Some Concerns |
| Gijsbers 2015 <sup>46</sup>      | Low           | Low           | Low           | Low           | Low           | Some Concerns | Some Concerns |
| Graham 2014 <sup>47</sup>        | Low           |
| Grimm 1988 <sup>48</sup>         | Low           |
| Grobbbee 1987 <sup>49</sup>      | Low           | Low           | Low           | Low           | Some Concerns | Some Concerns | Some Concerns |
| Gu 2001 <sup>50</sup>            | Low           | Low           | Low           | Low           | Some Concerns | Low           | Low           |
| He 2010 <sup>94</sup>            | Low           | Low           | Low           | Low           | Some Concerns | Some Concerns | Some Concerns |
| Kaplan 1985 <sup>51</sup>        | Low           | Low           | Low           | Low           | Some Concerns | Some Concerns | Some Concerns |
| Kawano 1998 <sup>52</sup>        | Some Concerns | Low           | Low           | Low           | Some Concerns | Some Concerns | Some Concerns |
| MacGregor 1982 <sup>53</sup>     | Low           | Low           | Low           | Low           | Some Concerns | Some Concerns | Some Concerns |
| Matlou 1986 <sup>54</sup>        | Some Concerns | Low           | Low           | Low           | Some Concerns | Some Concerns | Some Concerns |
| Matthensen 2012 <sup>55</sup>    | Some Concerns | Low           | Low           | Low           | Some Concerns | Low           | Some Concerns |
| Miller 1987 <sup>56</sup>        | High          | Low           | Low           | Low           | Some Concerns | Low           | High          |
| Overlack 1985 <sup>57</sup>      | Some Concerns | Some Concerns | Low           | Low           | Some Concerns | Some Concerns | Some Concerns |
| Overlack 1991 <sup>58</sup>      | Some Concerns | Low           | Low           | Low           | Some Concerns | Some Concerns | Some Concerns |
| Overlack 1995 <sup>59</sup>      | Some Concerns | Low           | Low           | Low           | Some Concerns | Low           | Some Concerns |
| Patki 1990 <sup>60</sup>         | Low           | Low           | Low           | Low           | Some Concerns | Low           | Low           |
| Richards 1984 <sup>61</sup>      | Some Concerns | Low           | Some Concerns | Low           | Some Concerns | Some Concerns | Some Concerns |
| Siani 1987 <sup>62</sup>         | Low           | Low           | Low           | Low           | Some Concerns | Low           | Low           |
| Skrabal 1984 <sup>63</sup>       | Some Concerns | Low           | Low           | Some Concerns | Some Concerns | Some Concerns | Some Concerns |
| Smith 1985 <sup>64</sup>         | Low           | Low           | Low           | Low           | Some Concerns | Some Concerns | Some Concerns |
| Sundar 1985 <sup>65</sup>        | Some Concerns | Low           | Low           | Low           | Some Concerns | Low           | Some Concerns |
| Valdes 1991 <sup>66</sup>        | Some Concerns | Low           | Low           | Low           | Some Concerns | Some Concerns | Some Concerns |
| Vongpatanasin 2016 <sup>67</sup> | Low           | Low           | Low           | Low           | Some Concerns | Some Concerns | Some Concerns |
| Whelton 1995 <sup>68, 69</sup>   | Low           | Low           | Low           | Low           | Some Concerns | Low           | Low           |

Domains are: 1) randomization process errors; (2) deviations from the intended interventions; (3) missing outcome data; (4) systematic errors in measurement of the outcome; (5) bias in selection of the reported result; (6) use of a wash-out period in cross-over study design.

**Figure S1. Dose-response meta-analysis of changes in systolic blood pressure (SBP) and diastolic blood pressure (DBP) levels (as mmHg) according to differences in potassium excretion between the treatment arms at the end of the trials, and to achieved potassium excretion levels between arms at the end of the trials.**

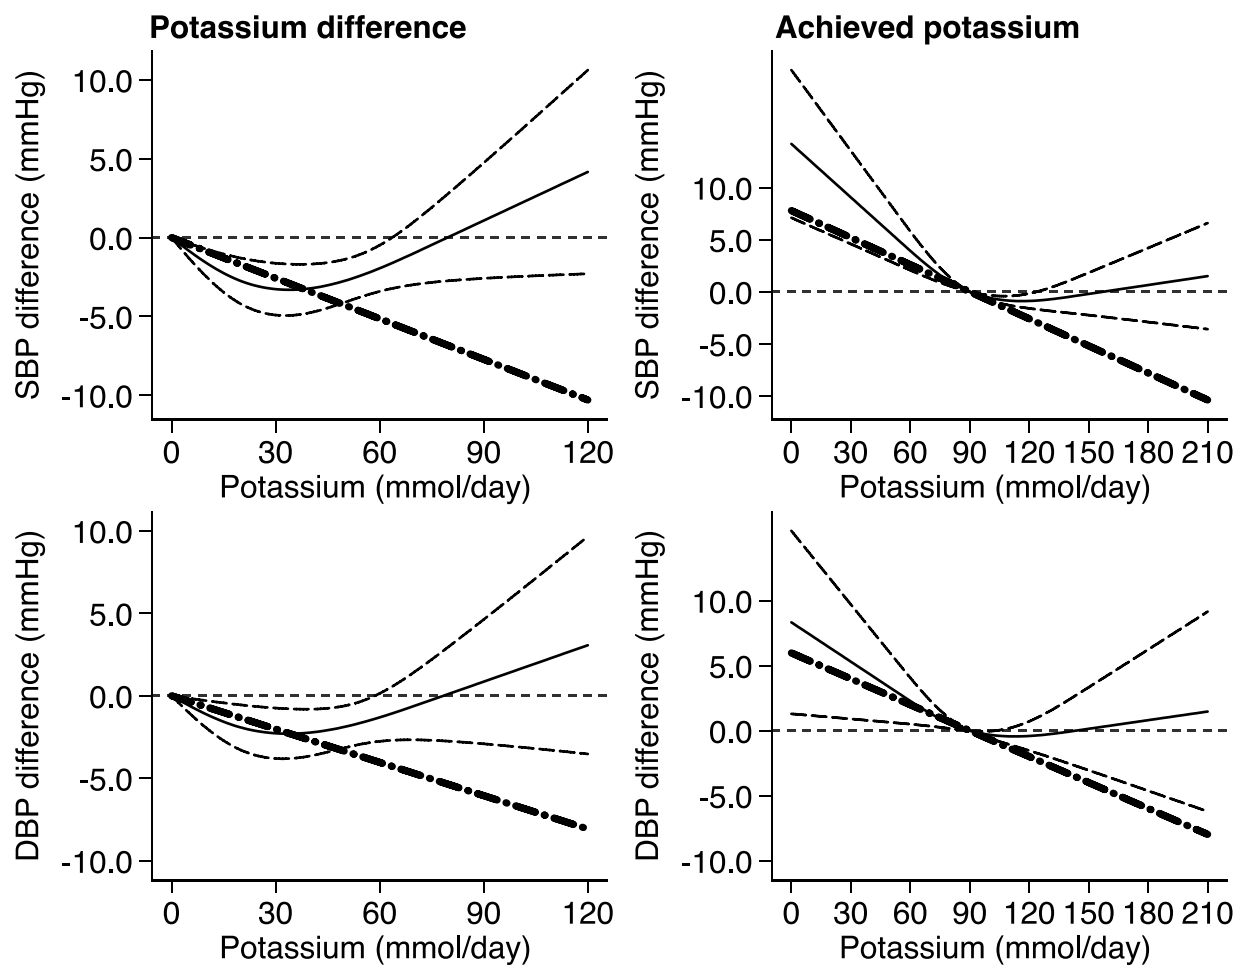

Spline curve (solid line) with 95% confidence limits (long dashed lines), and background dash-dotted line using a linear function in a dose-response meta-analysis.

**Figure S2. Meta-analysis of mean difference for changes in systolic (SBP) and diastolic (DBP) blood pressure levels between potassium treated and non-treated groups considering overall studies.**

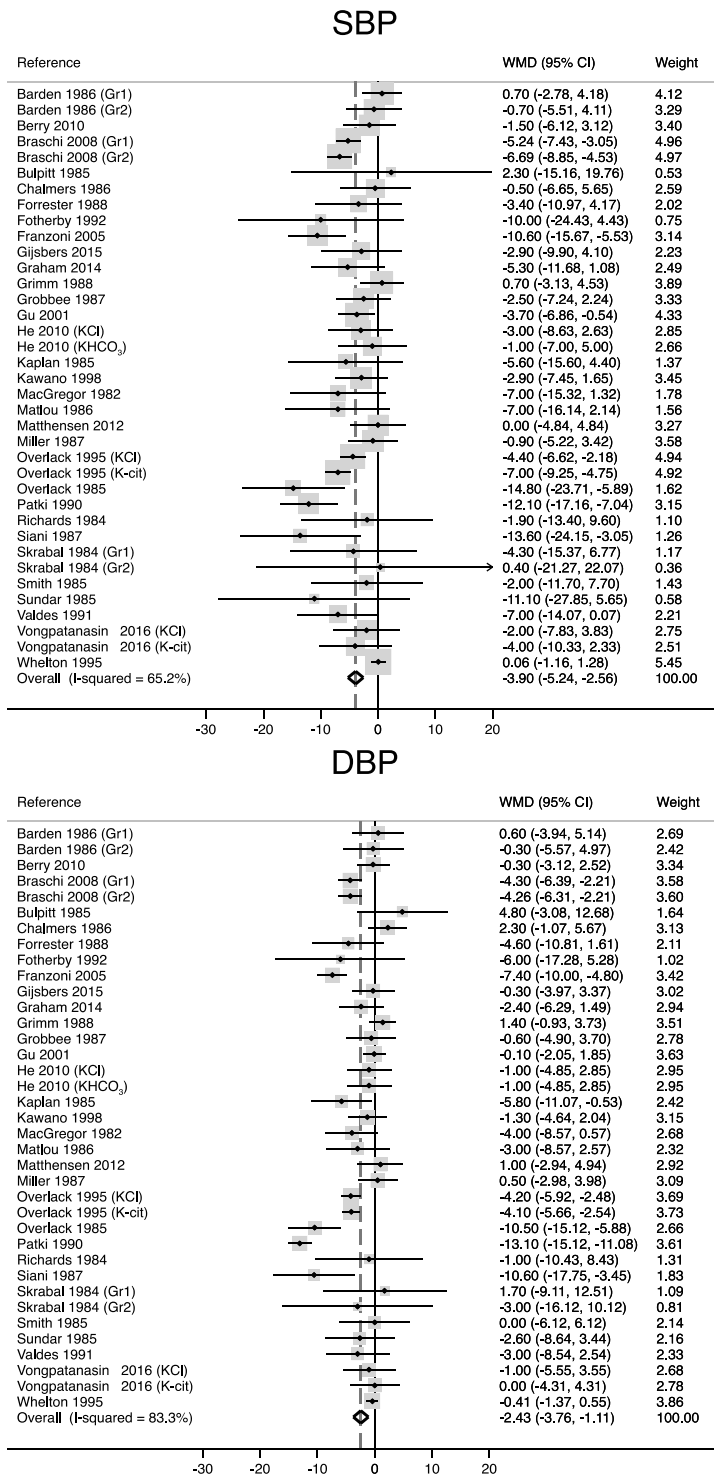

**Figure S3. Dose-response meta-analysis of changes in systolic blood pressure (SBP) and diastolic blood pressure (DBP) levels (as mmHg) after excluding the two trials at high risk of bias according to differences in potassium excretion between the treatment arms at the end of the trials, and to achieved potassium excretion levels between arms at the end of the trials (N=30).**

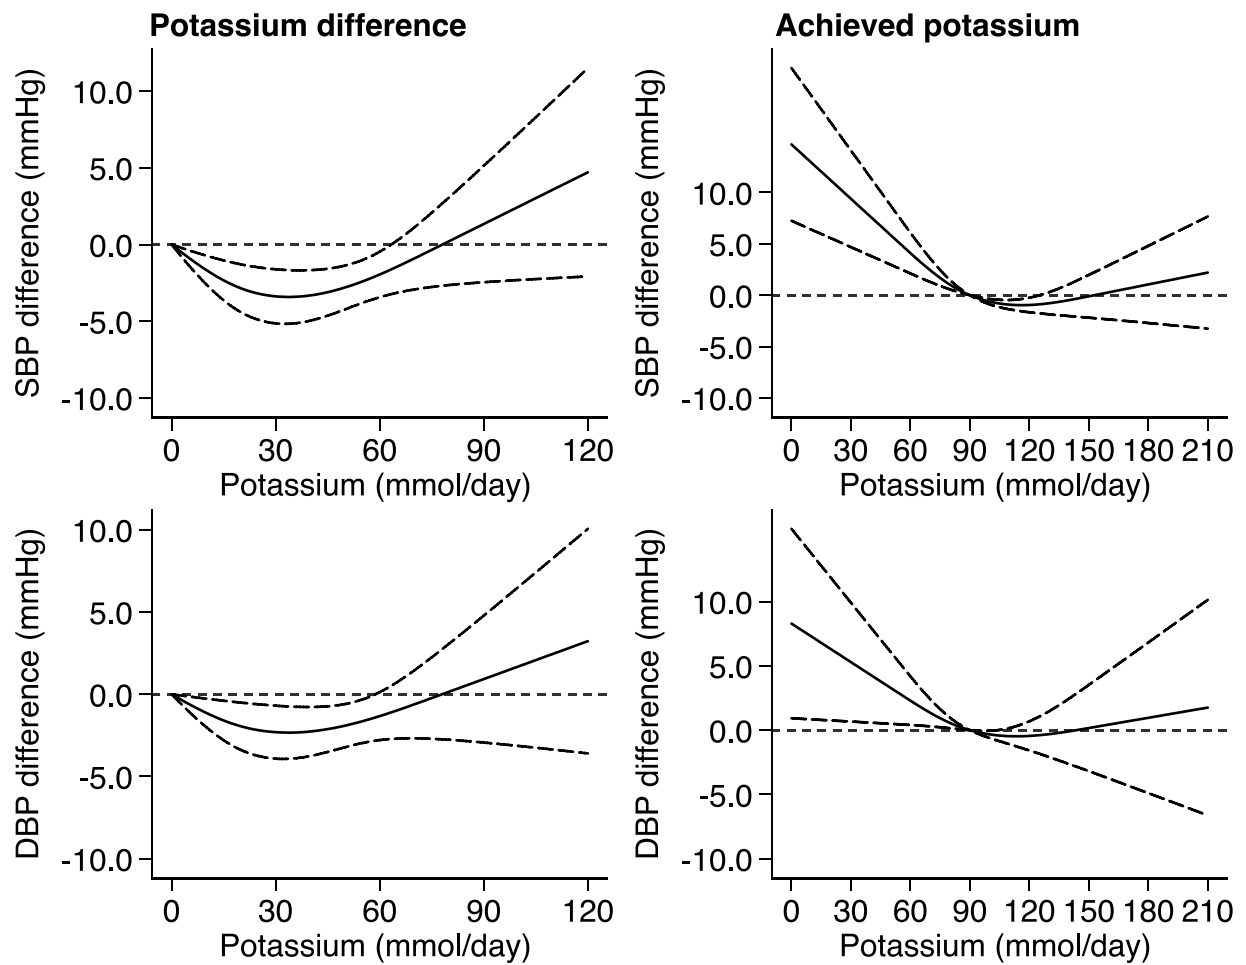

Spline curve (solid line) with 95% confidence limits (long dashed lines).

**Figure S4. Meta-analysis of mean difference for changes in systolic (SBP) and diastolic (DBP) blood pressure levels (as mmHg) between potassium treated and non-treated groups after excluding the two studies at high risk of bias (N=30).**

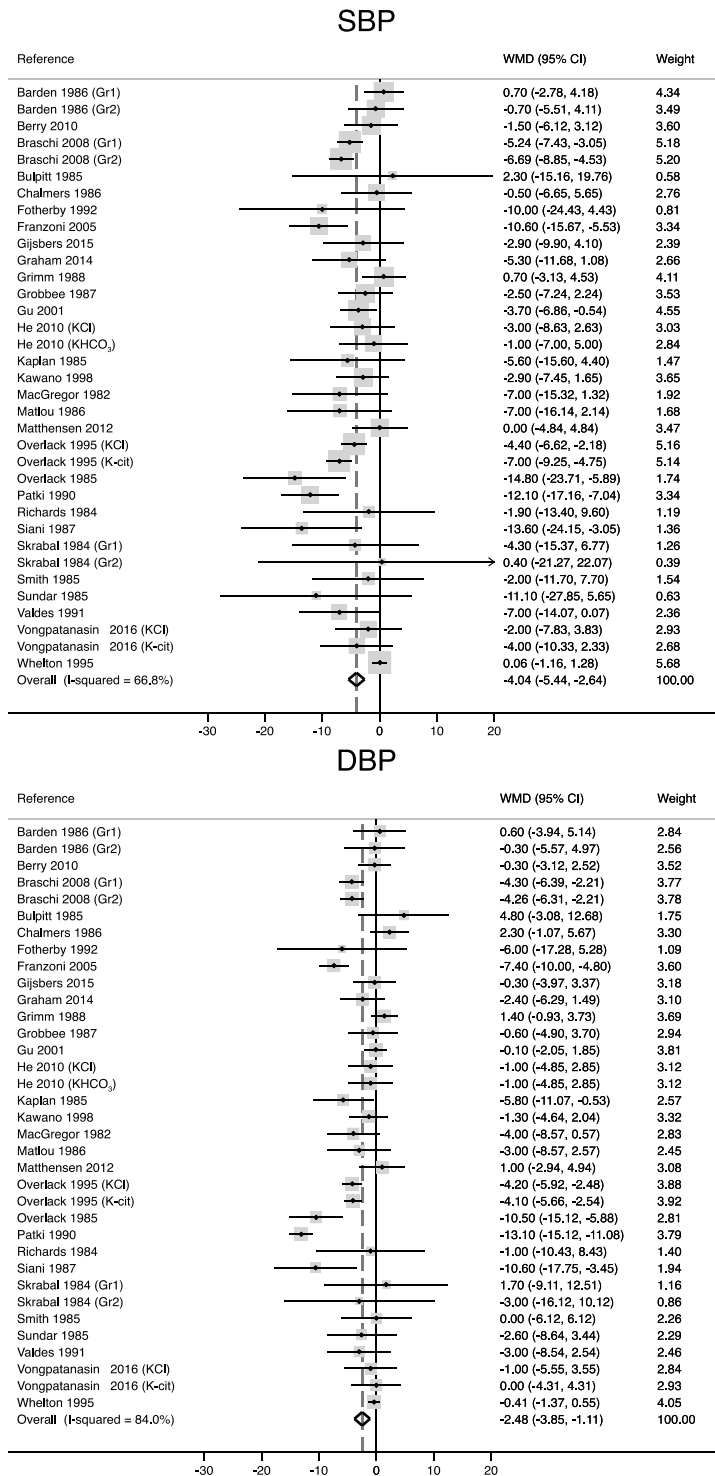

**Figure S5. Sensitivity analysis of mean difference for changes in systolic (SBP) blood pressure levels (as mmHg) between potassium treated and non-treated groups after removal of single study result (leave-one-out analysis).**

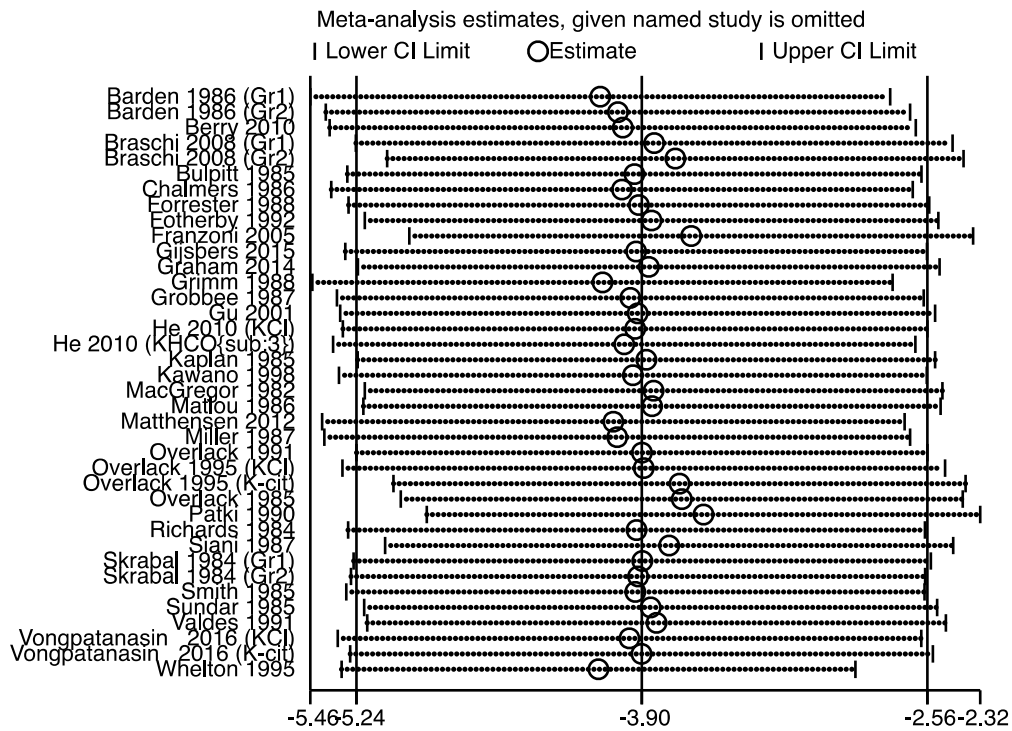

Each given named study is omitted when computing the overall meta-analysis summary estimate.



**Figure S6. Sensitivity analysis of mean difference for changes in diastolic (DBP) blood pressure levels (as mmHg) between potassium treated and non-treated groups after removal of single study result (leave-one-out analysis).**

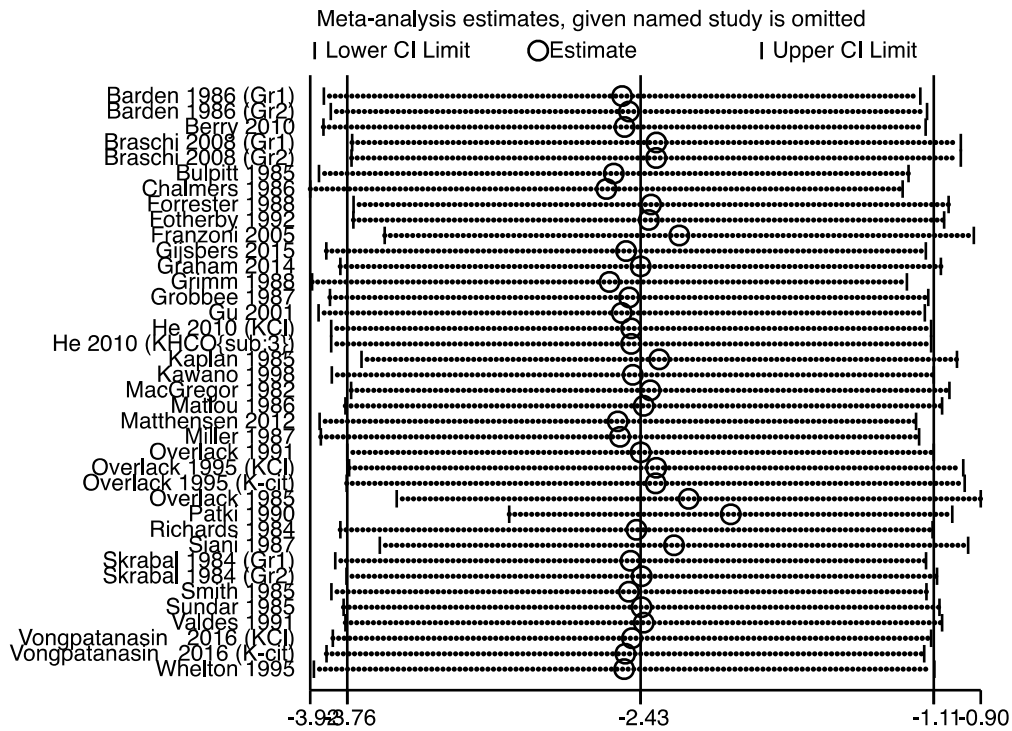

Each given named study is omitted when computing the overall meta-analysis summary estimate.

Figure S7. Dose-response meta-analysis of changes in systolic blood pressure (SBP) and diastolic blood pressure (DBP) levels (as mmHg) according to differences in potassium excretion between the treatment arms (potassium supplemented and control group) at the end of the trials.

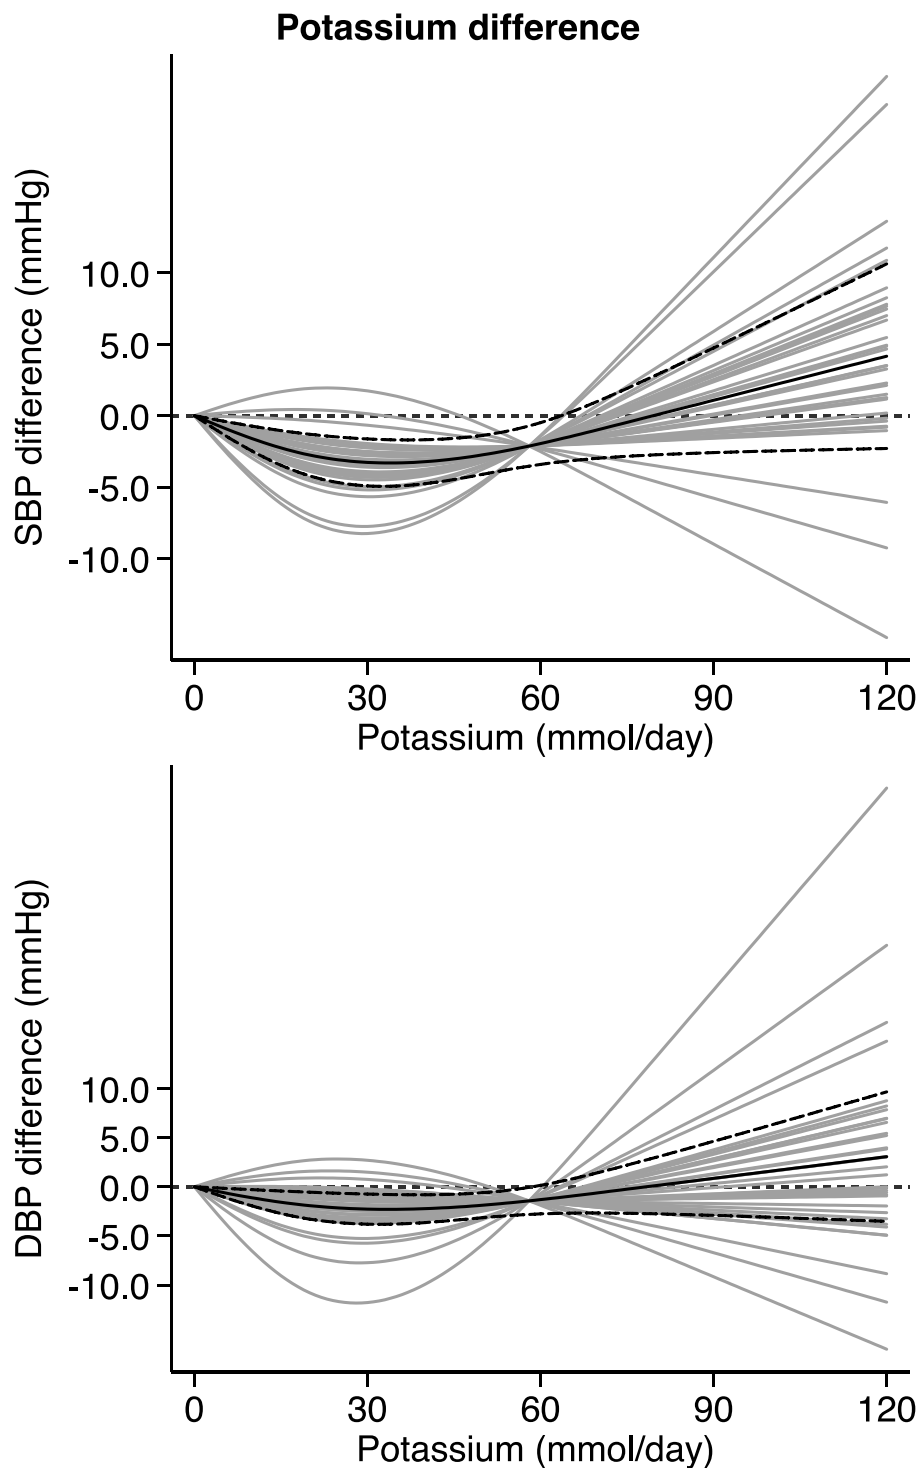

All studies included (N=32). Sensitivity analysis of overall spline curve (black solid line) with 95% confidence limits (black dashed lines) and the study-specific trends showing the influence of variation across studies (gray solid lines).

Figure S8. Dose-response meta-analysis of changes in systolic blood pressure (SBP) and diastolic blood pressure (DBP) levels (as mmHg) according to achieved potassium excretion levels between arms (potassium supplemented and control group) at the end of the trials.

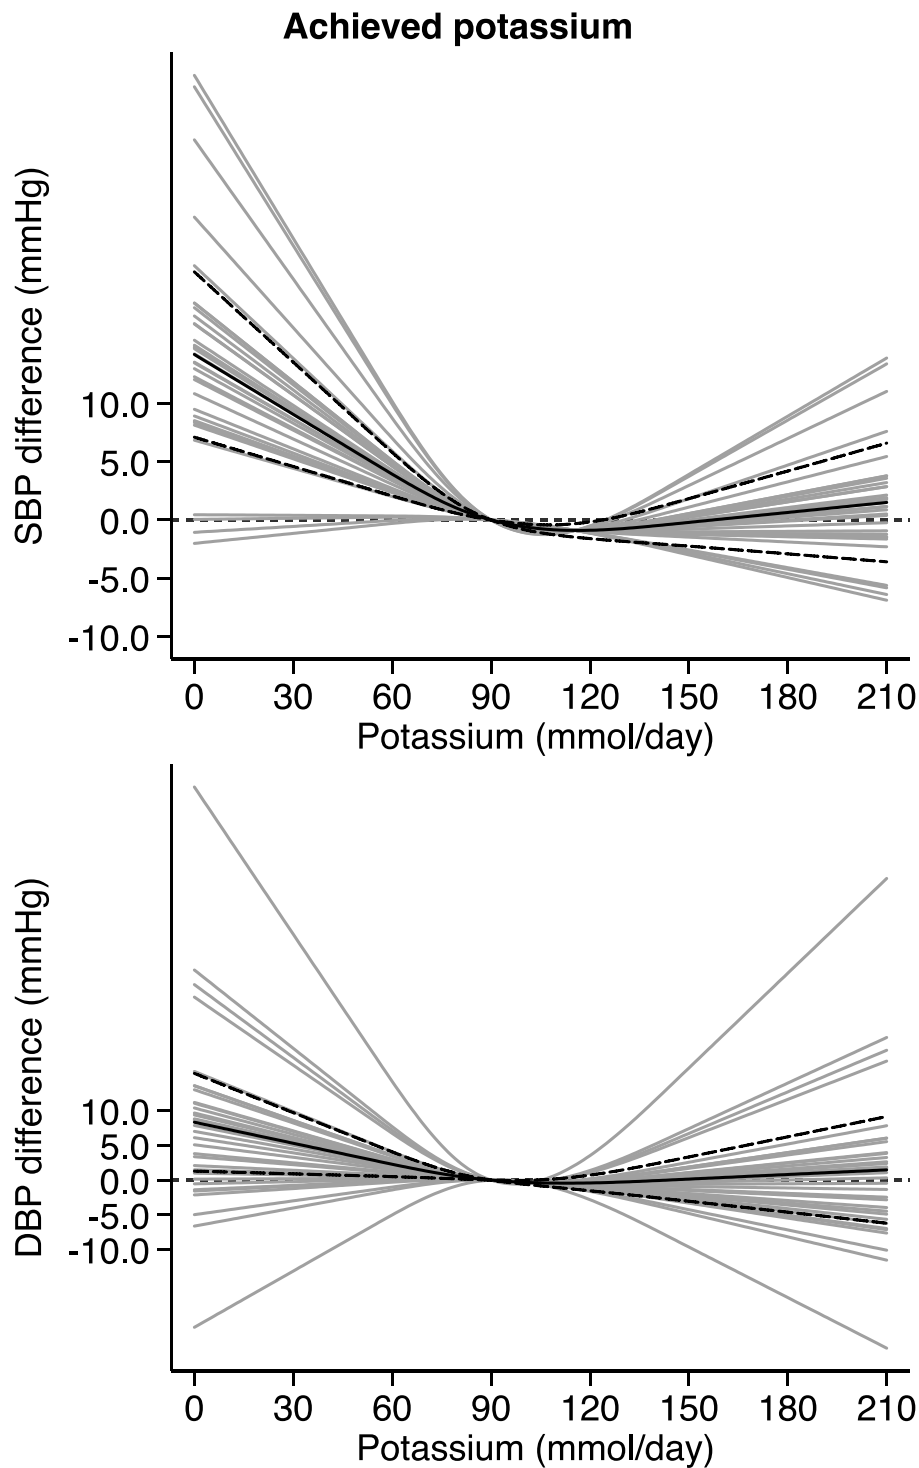

All studies included (N=32). Sensitivity analysis of overall spline curve (black solid line) with 95% confidence limits (black dashed lines) and the study-specific trends showing the influence of variation across studies (gray solid lines).

**Figure S9. Meta-analysis of mean difference for changes in systolic (SBP) and diastolic (DBP) blood pressure levels (as mmHg) between potassium treated and non-treated groups in participants with hypertension and with no hypertension.**

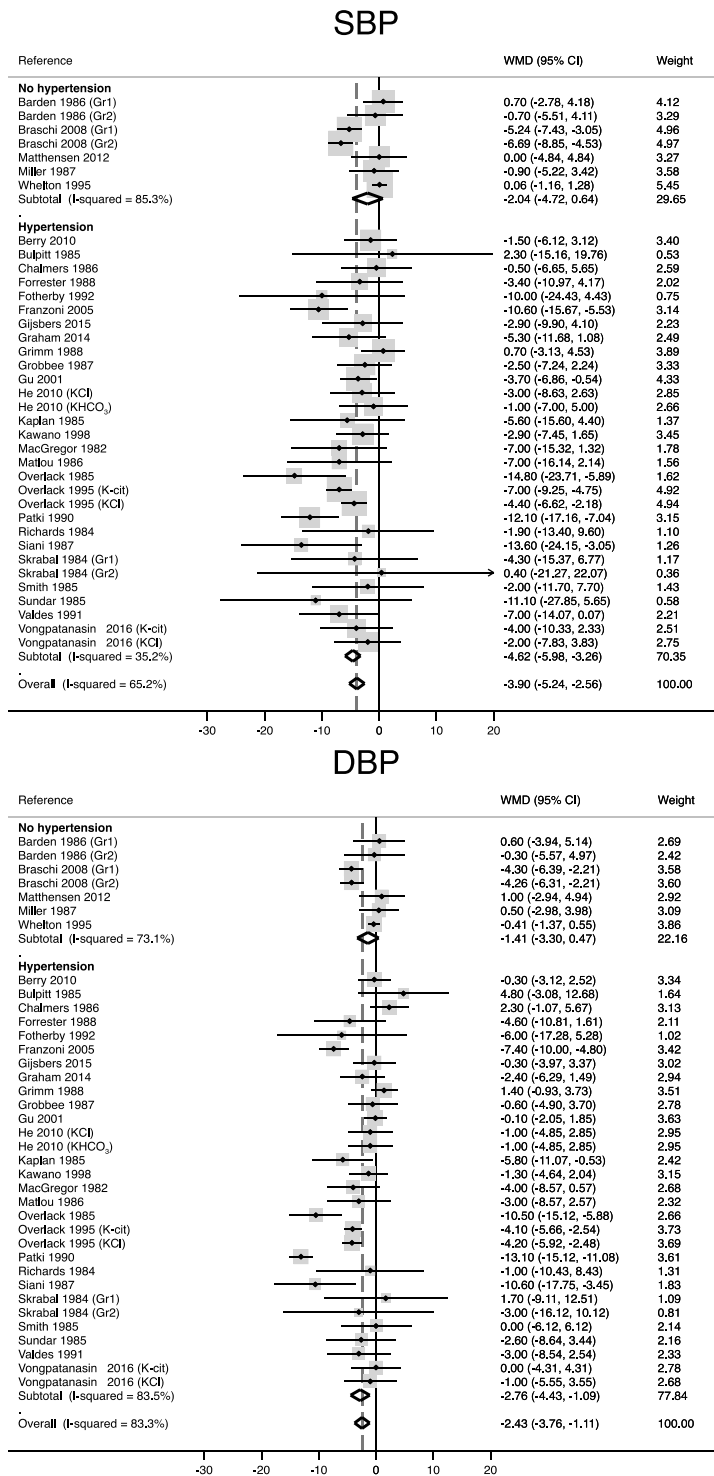

**Figure S10. Meta-analysis of mean difference for changes in systolic (SBP) and diastolic (DBP) blood pressure levels (as mmHg) between potassium treated and non-treated groups in participants with hypertension by use of anti-hypertensive medications.**

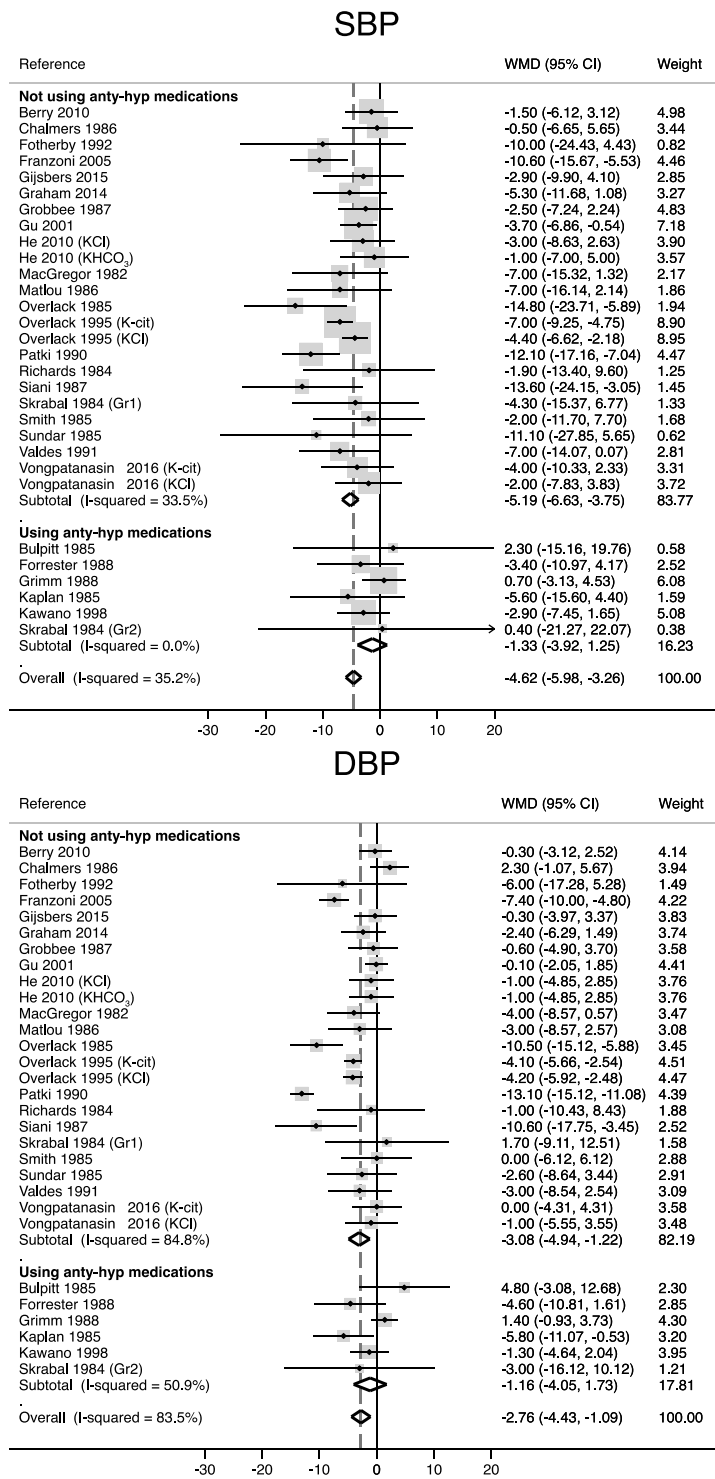

**Figure S11. Dose-response meta-analysis of changes in systolic blood pressure (SBP) and diastolic blood pressure (DBP) levels (as mmHg) according to differences in potassium excretion between the treatment arms at the end of the trials and by study design (cross-over N=23 vs. parallel N=9).**

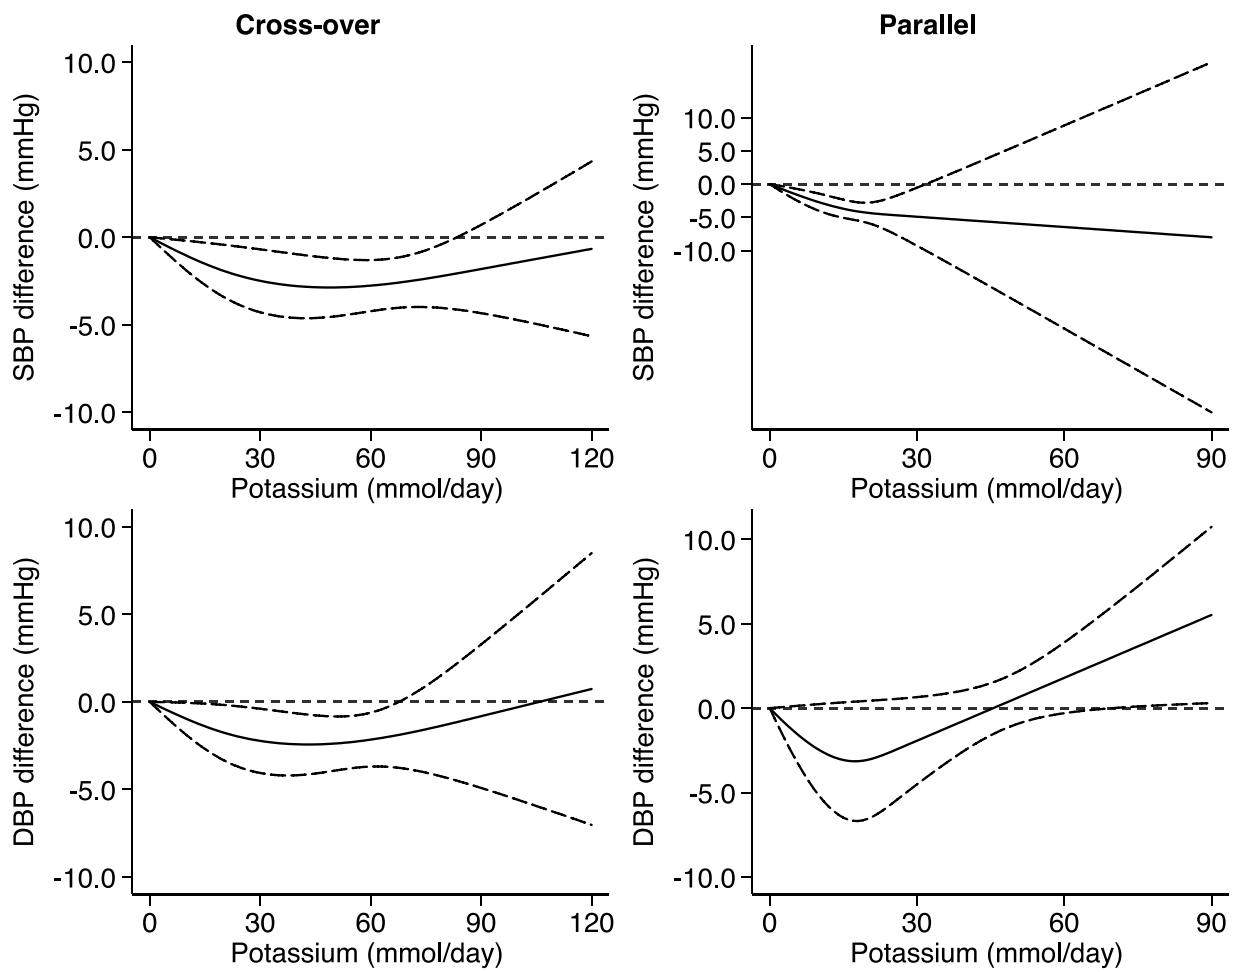

Spline curve (solid line) with 95% confidence limits (long dashed lines).

**Figure S12. Dose-response meta-analysis of changes in systolic blood pressure (SBP) and diastolic blood pressure (DBP) levels (as mmHg) according to differences in potassium excretion between the treatment arms at the end of the trials and by study design (cross-over N=23 vs. parallel N=9), in subjects with hypertension only.**

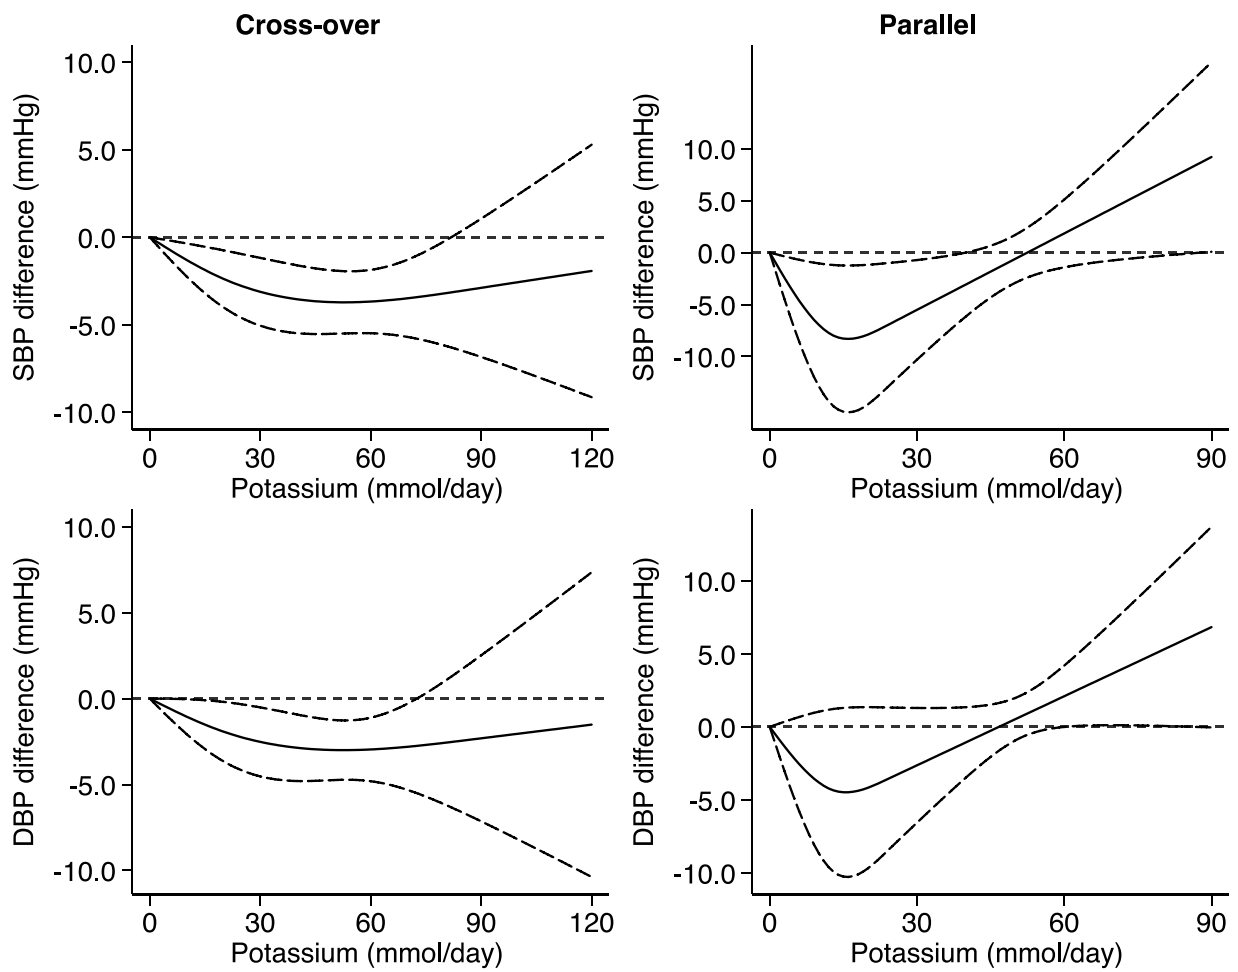

Spline curve (solid line) with 95% confidence limits (long dashed lines).

**Figure S13. Meta-analysis of mean difference for changes in systolic (SBP) and diastolic (DBP) blood pressure levels (as mmHg) between potassium treated and non-treated groups in all participants after stratification by study design (cross-over vs. parallel).**

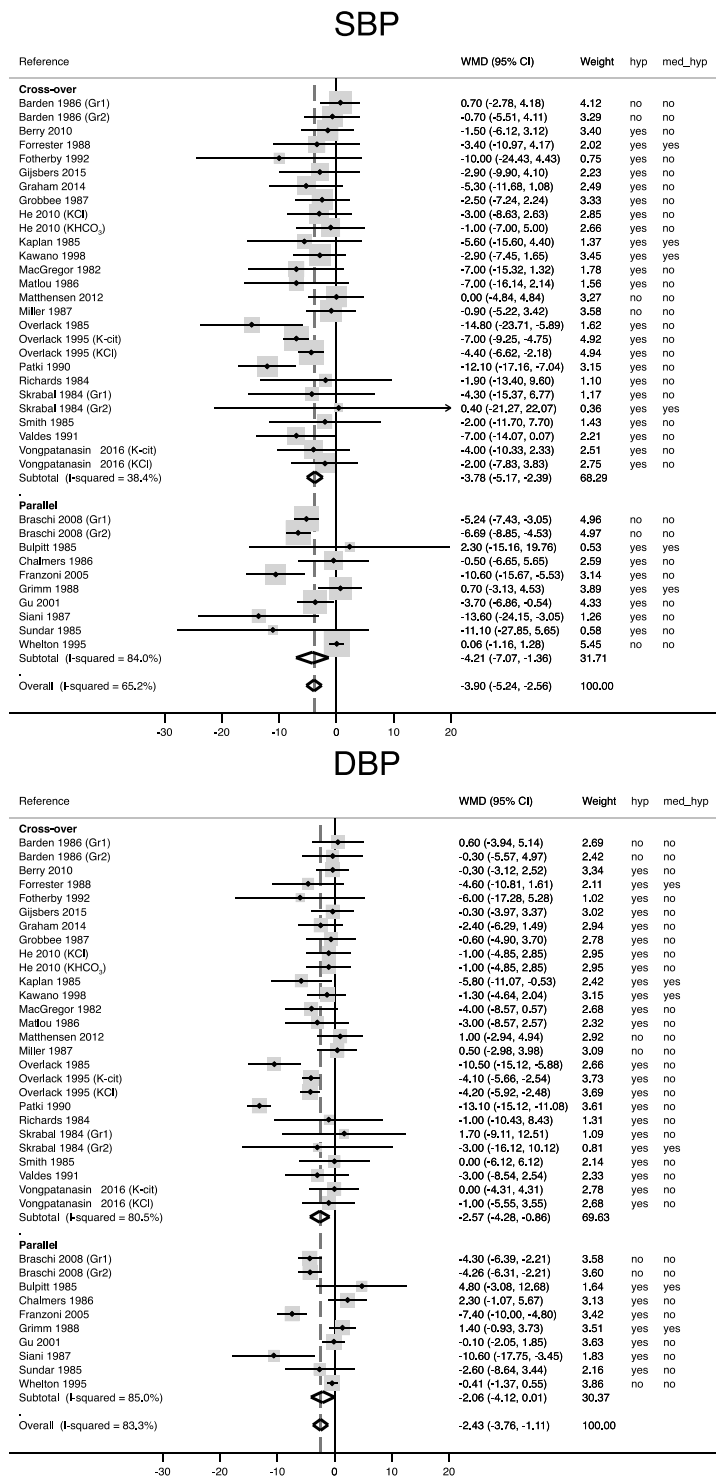



**Figure S14. Meta-analysis of mean difference for changes in systolic (SBP) and diastolic (DBP) blood pressure levels (as mmHg) between potassium treated and non-treated groups after stratification by study design (cross-over vs. parallel) in subjects with hypertension only.**

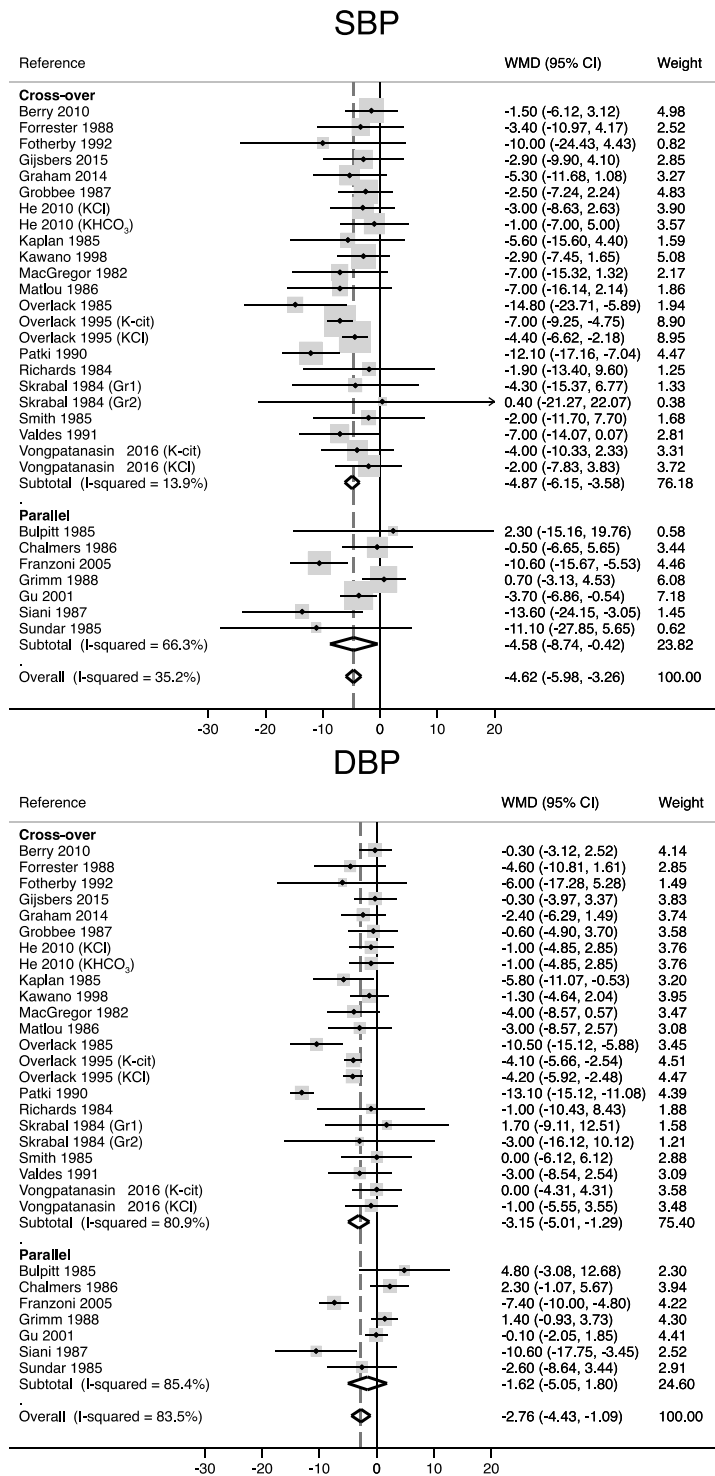

**Figure S15. Dose-response meta-analysis of changes in systolic blood pressure (SBP) and diastolic blood pressure (DBP) levels (as mmHg) according to differences in potassium excretion between the treatment arms at the end of the trials in studies with baseline potassium excretion (uK) below 75 mmol/day (N=26), and equal or above 75 mmol/day (N=8).**

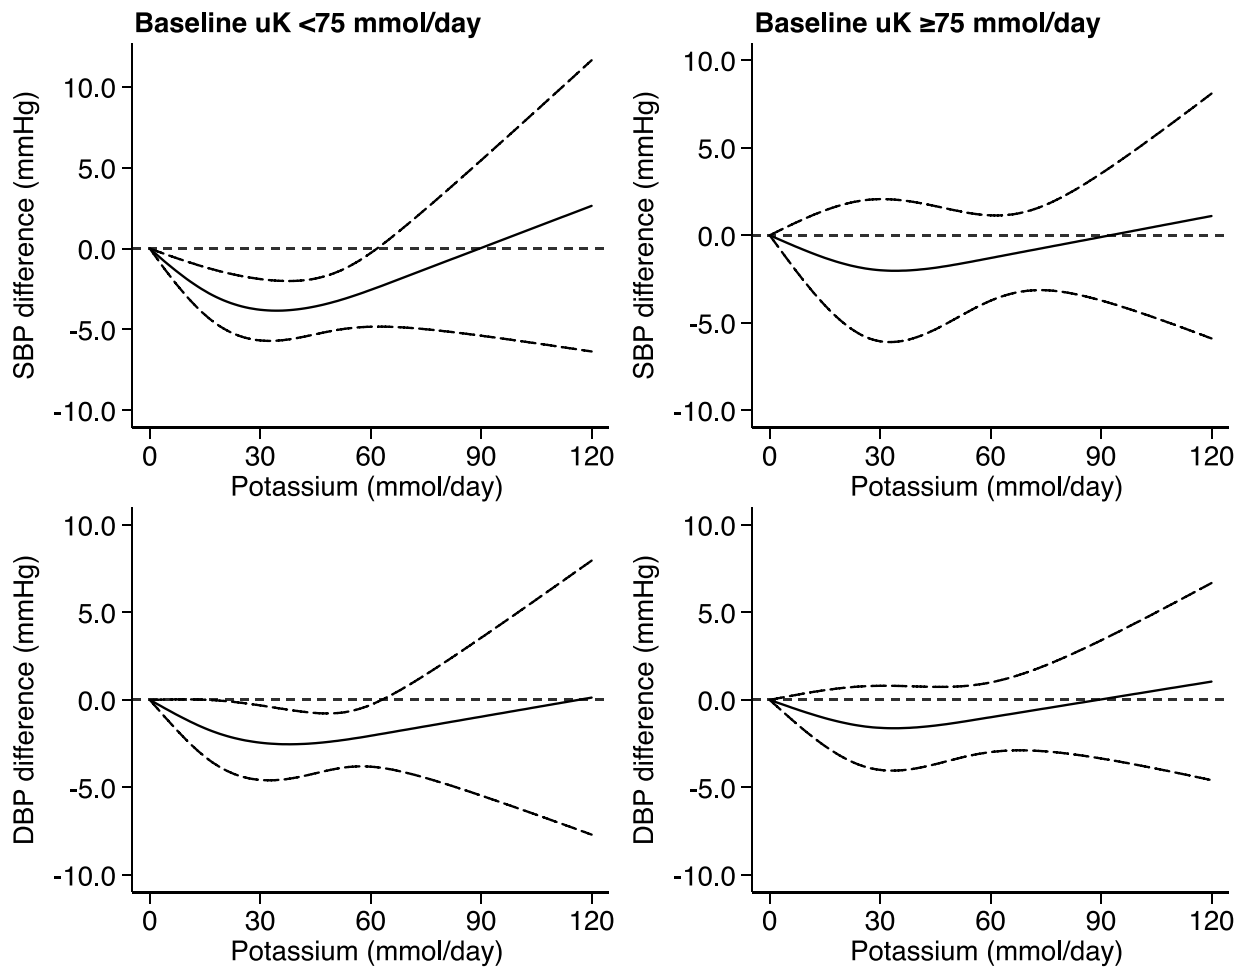

Spline curve (solid line) with 95% confidence limits (long dashed lines).

**Figure S16. Meta-analysis of mean difference for changes in systolic (SBP) and diastolic (DBP) blood pressure levels (as mmHg) between potassium treated and non-treated groups after stratification by baseline potassium (uK <75 mmol/day, and ≥75 mmol/day).**

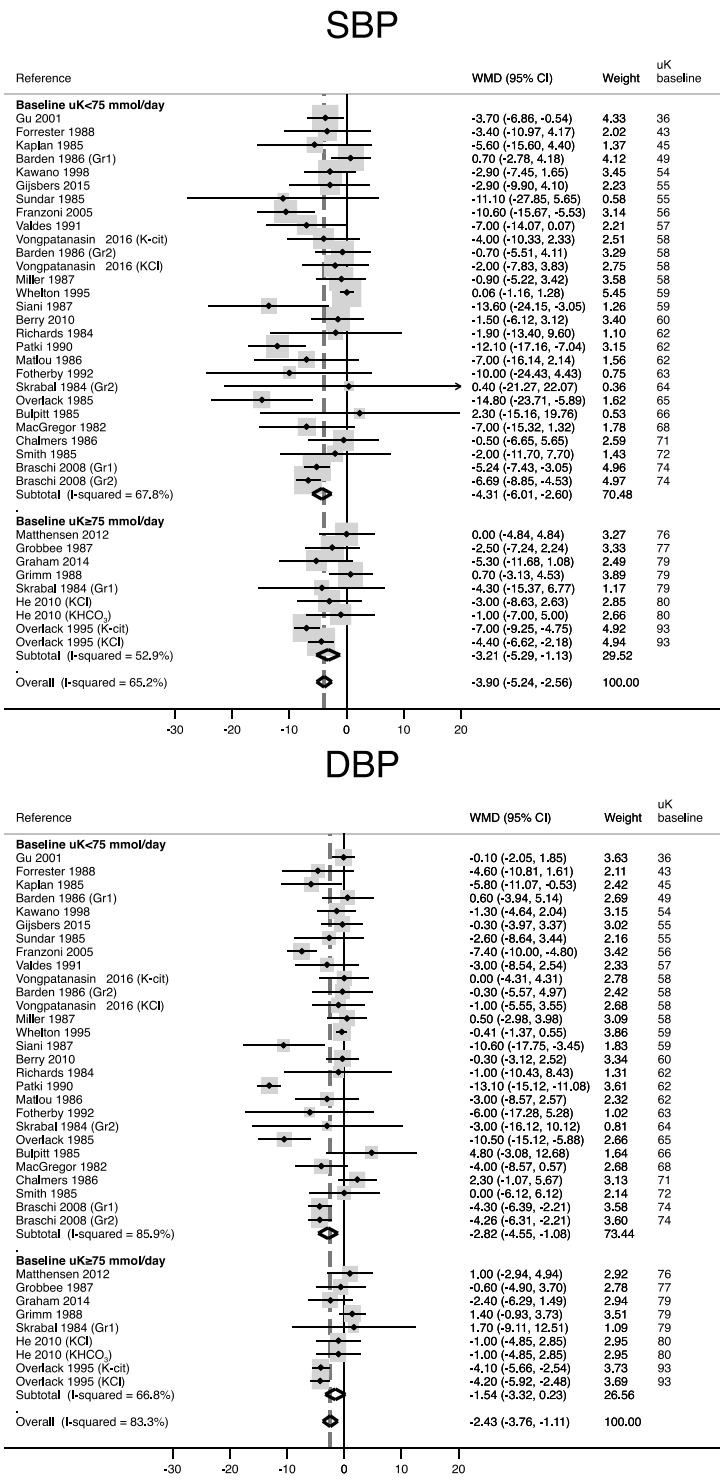

**Figure S17. Meta-analysis of mean difference for changes in systolic (SBP) and diastolic (DBP) blood pressure levels (as mmHg) between potassium treated and non-treated groups after stratification by baseline sodium (uNa <3 g/day, 3-4 g/day, and ≥4 g/day).**

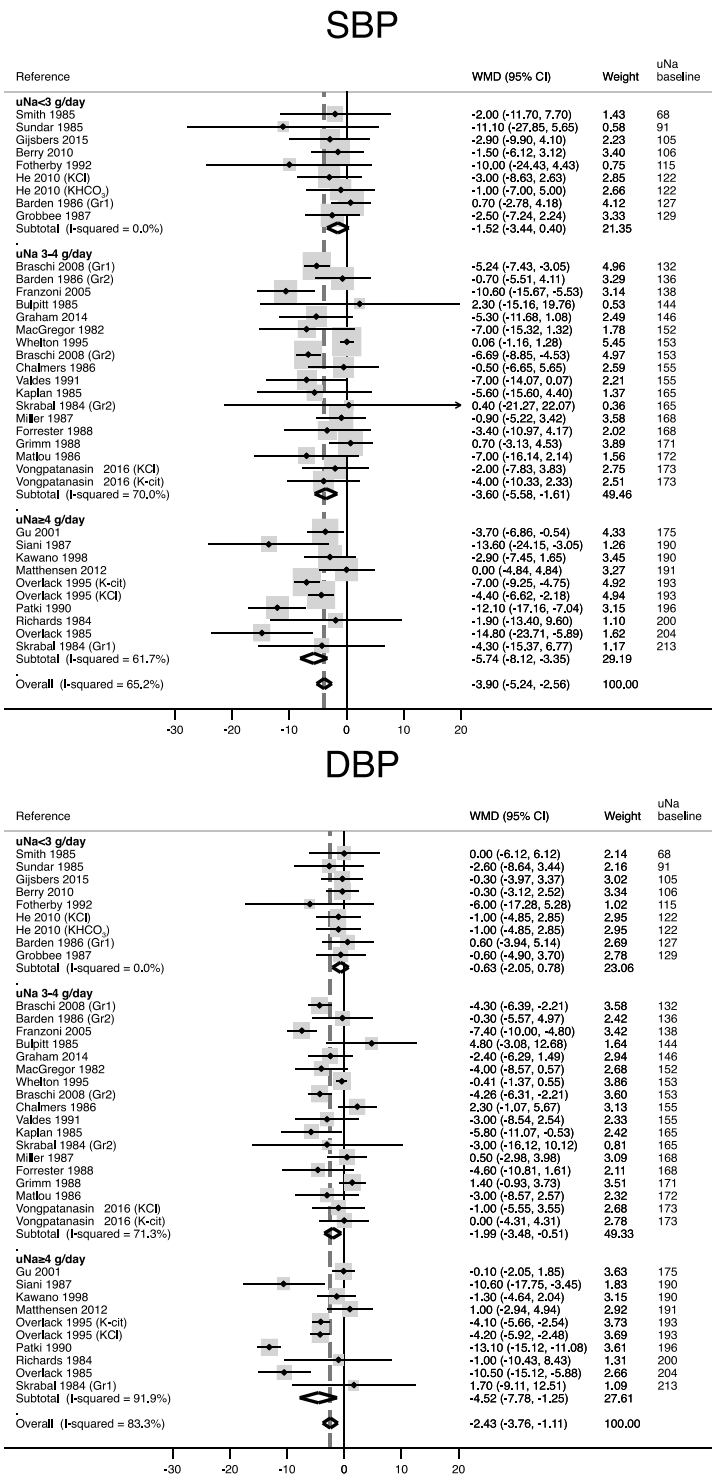

**Figure S18. Meta-analysis of mean difference for changes in systolic (SBP) and diastolic (DBP) blood pressure levels (as mmHg) between potassium treated and non-treated groups by position of BP measurement (supine, standing, seated, or other).**

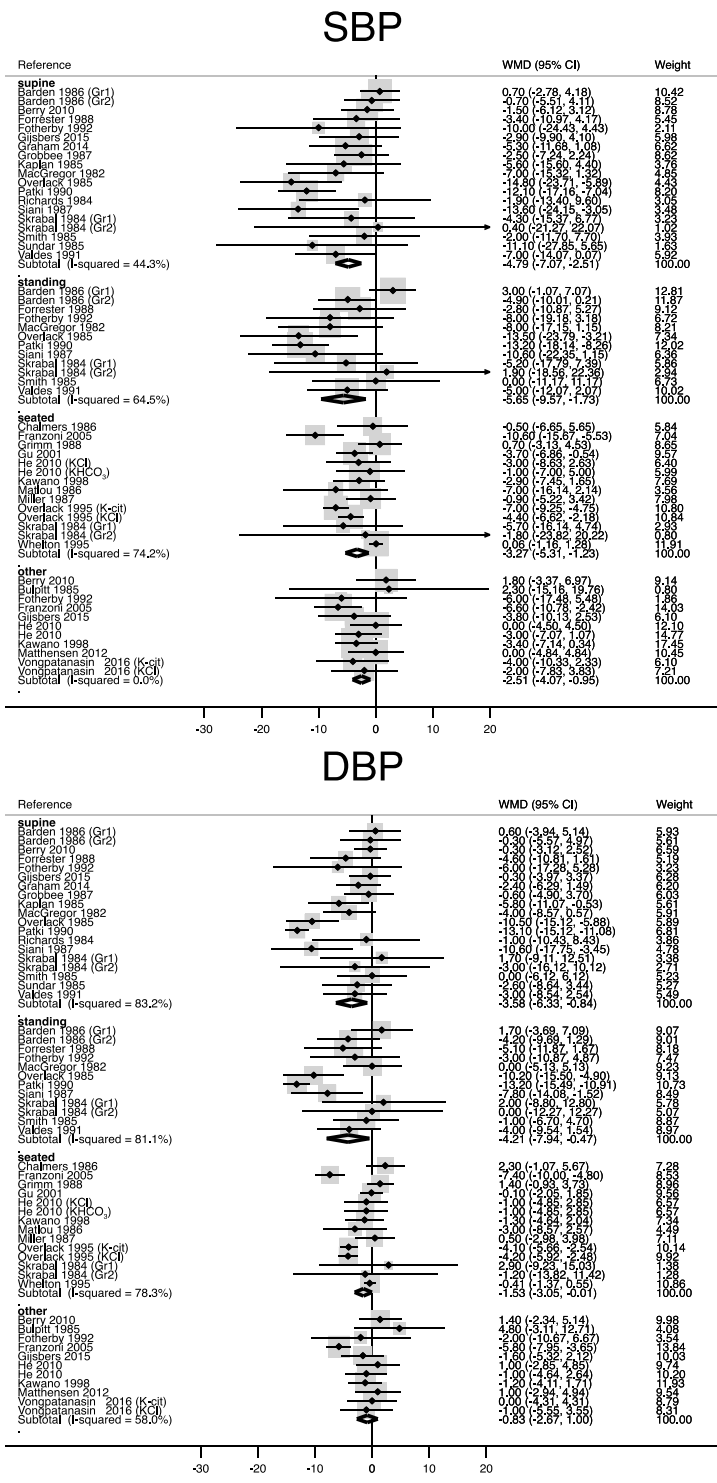

**Figure S19. Meta-analysis of mean difference for changes in systolic (SBP) and diastolic (DBP) blood pressure levels (as mmHg) between potassium treated and non-treated groups by blood pressure measurement modality (automatic vs. manual).**

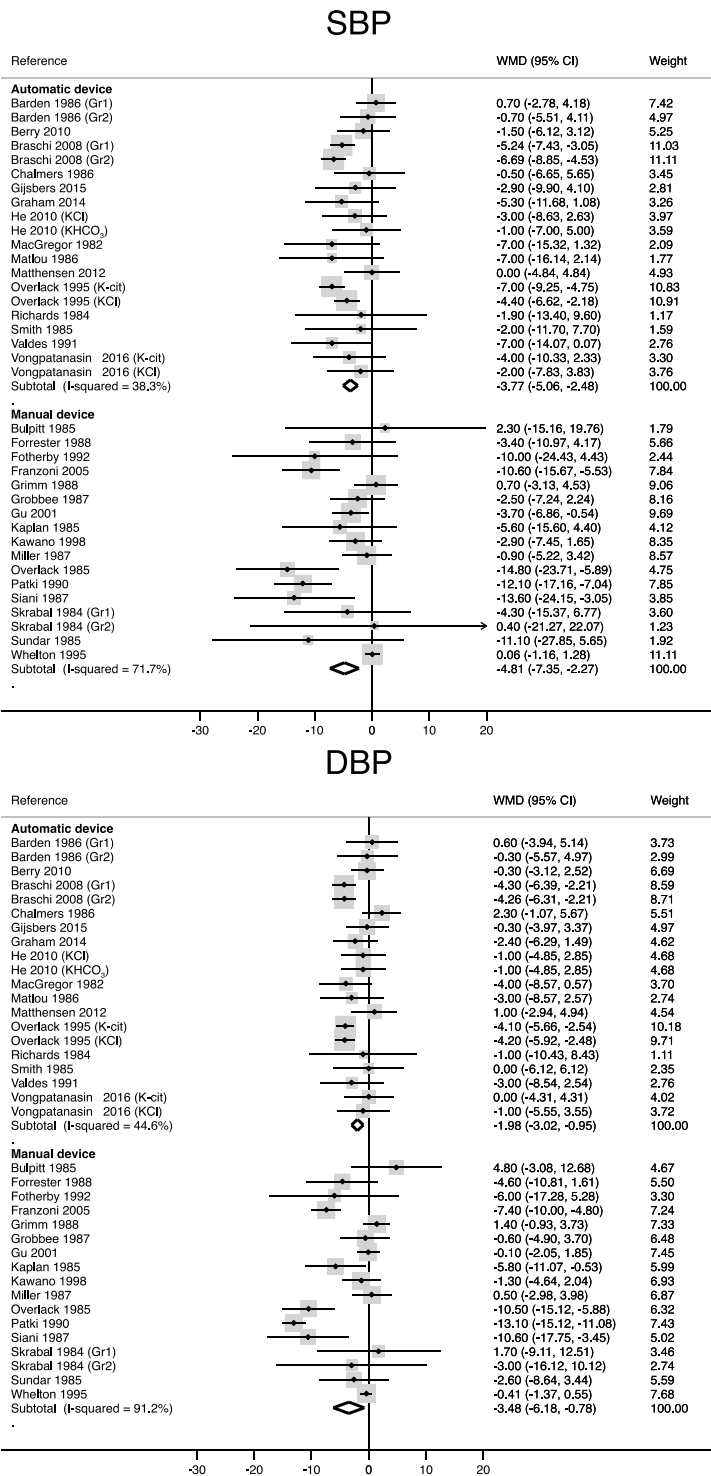

**Figure S20. Dose-response meta-analysis of changes in systolic blood pressure (SBP) and diastolic blood pressure (DBP) levels (as mmHg) according to differences in potassium excretion between the treatment arms at the end of the trials by position of BP measurement (supine N=19, standing N=11, seated N=11, or other N=9).**

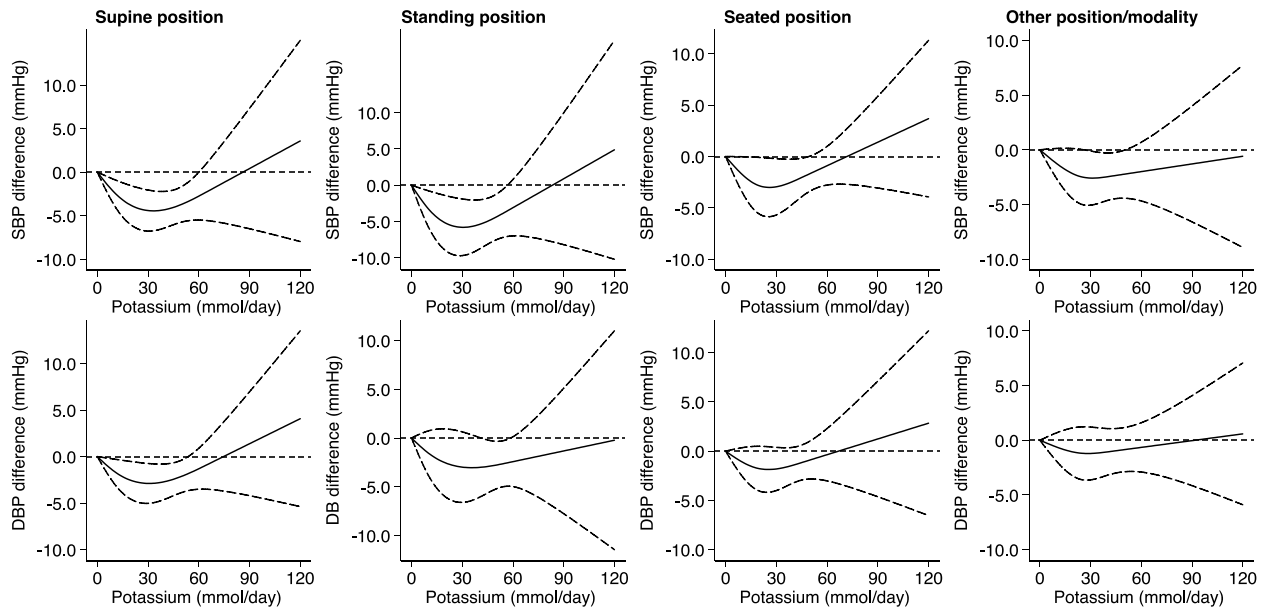

Spline curve (solid line) with 95% confidence limits (long dashed lines).

**Figure S21. Dose-response meta-analysis of changes in systolic blood pressure (SBP) and diastolic blood pressure (DBP) levels (as mmHg) according to differences in potassium excretion between the treatment arms at the end of the trials by BP measurement modality (automatic N=15 vs. manual device N=17).**

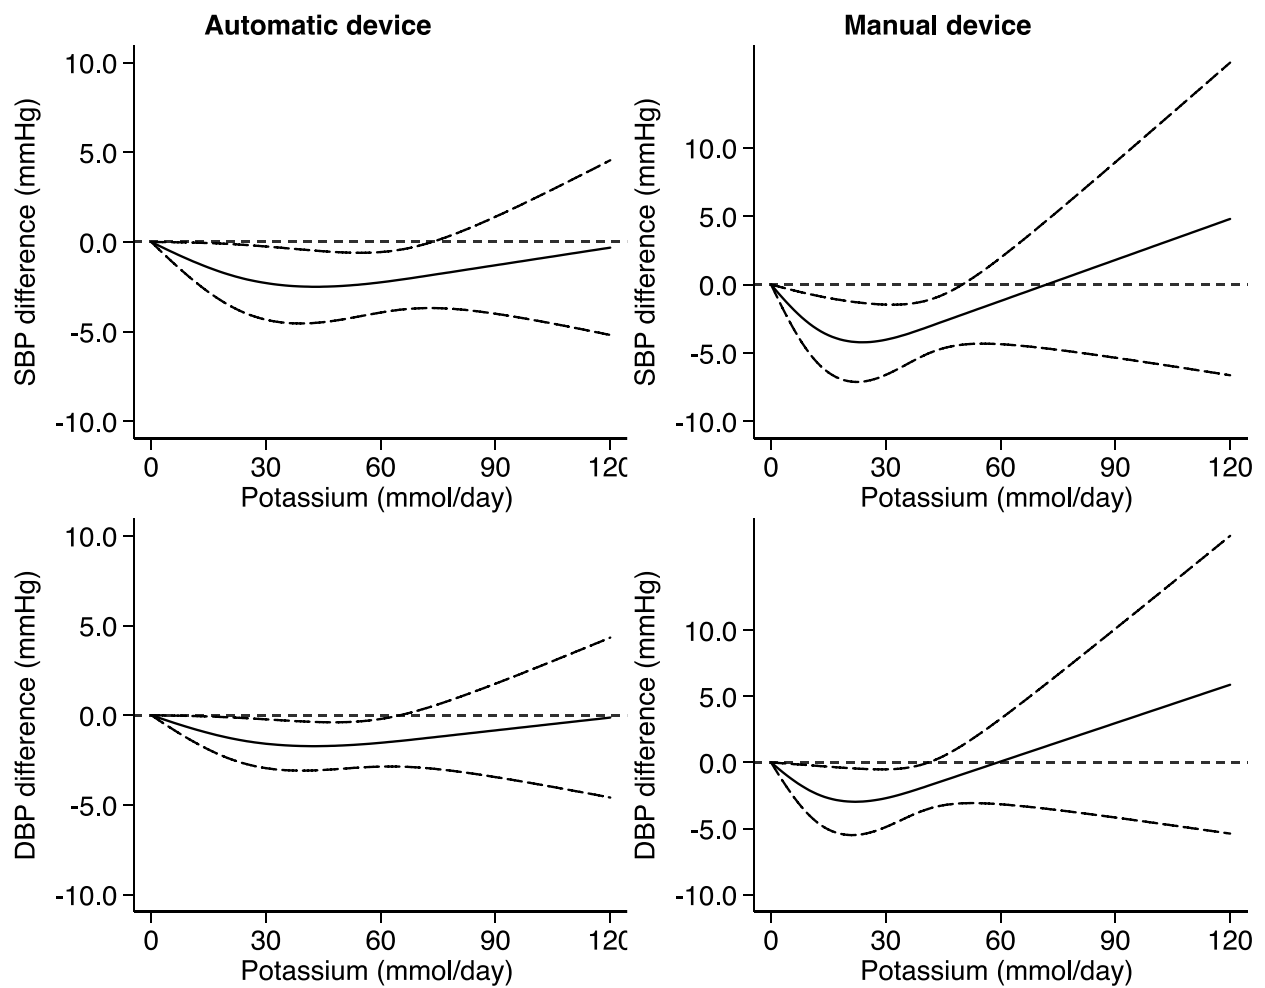

Spline curve (solid line) with 95% confidence limits (long dashed lines).



**Figure S22. Dose-response meta-analysis of changes in systolic blood pressure (SBP) and diastolic blood pressure (DBP) levels (as mmHg) according to differences in potassium excretion between the treatment arms at the end of the trials with duration  $\geq 12$  weeks (N=5).**

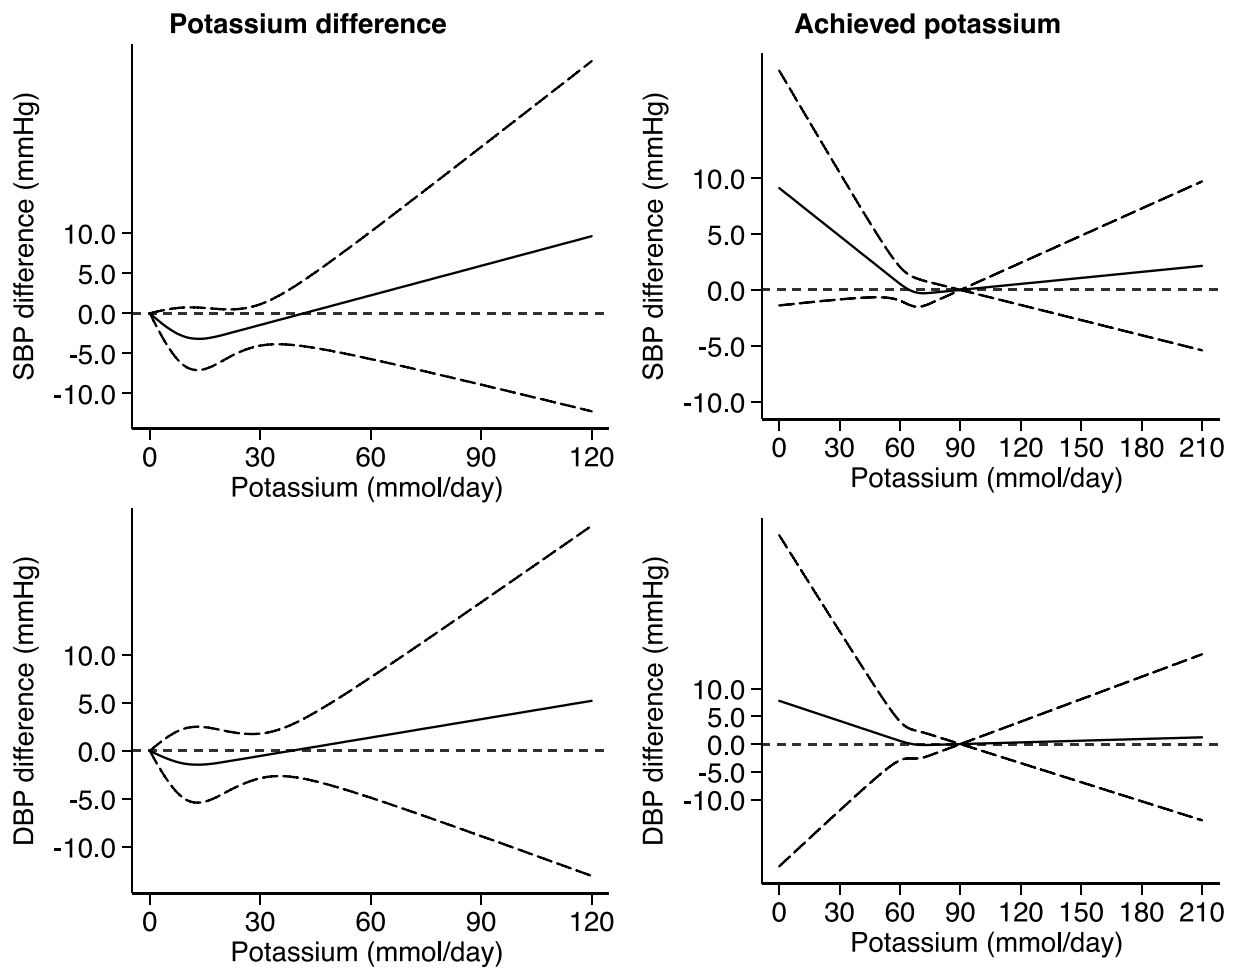

Spline curve (solid line) with 95% confidence limits (long dashed lines).

Figure S23. Funnel plots for publication bias for mean difference for changes in systolic (SBP) and diastolic (DBP) blood pressure levels (as mmHg) and its standard error (SE).

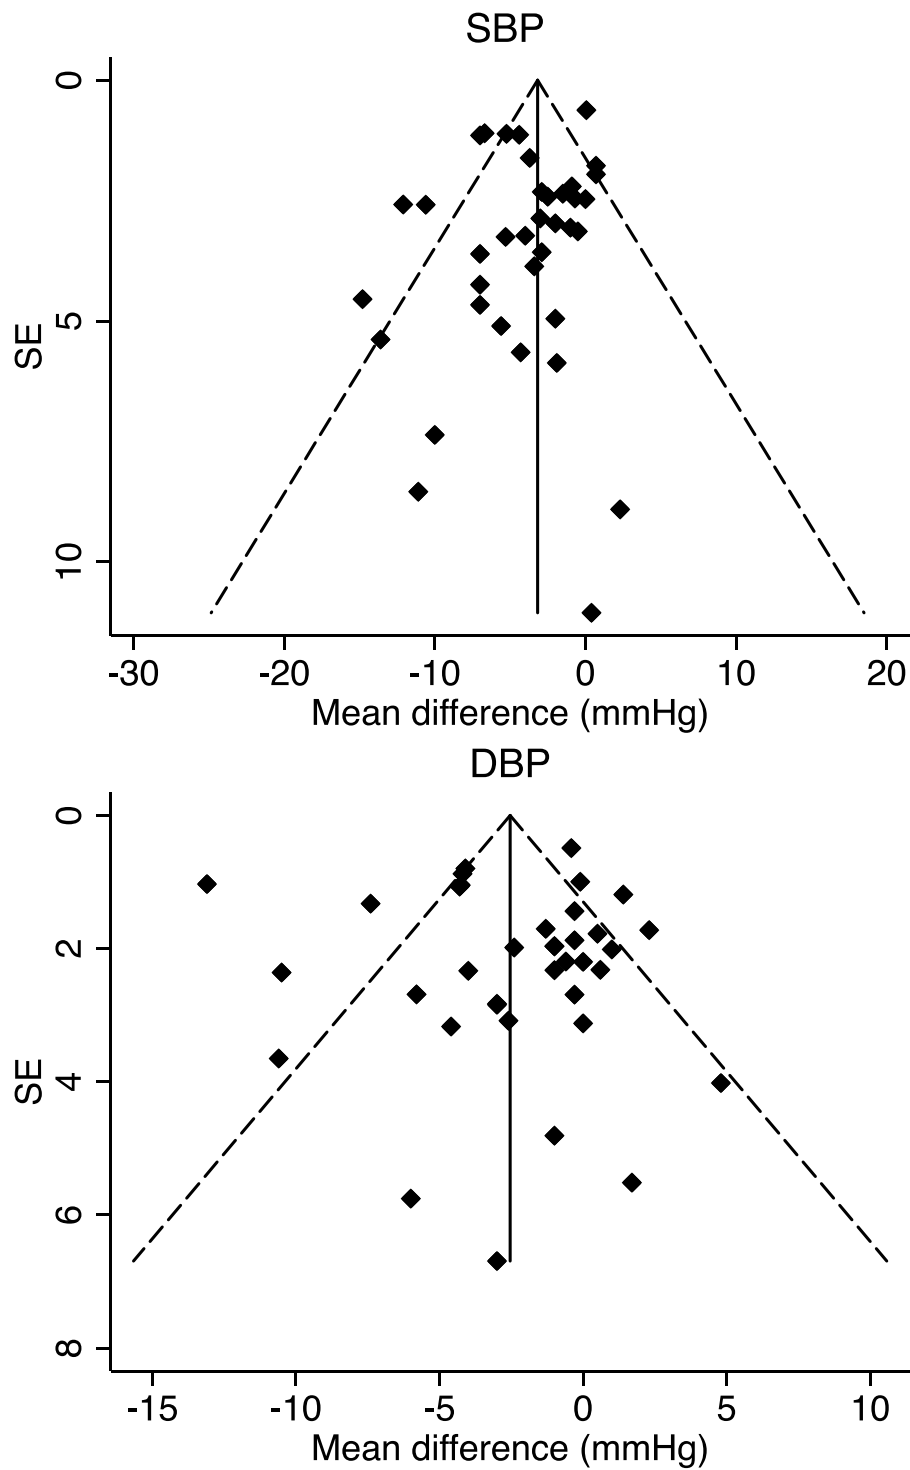

Supplement: JAH3-9-e015719-s001.pdf [file JAH3-9-e015719-s001.pdf]
